# Supplementary material
Source: Springer Nature journal article supplement (https://www.springermedizin.de/resource/supplementary/12963_2009_91_MOESM4_ESM.pdf/9572694)

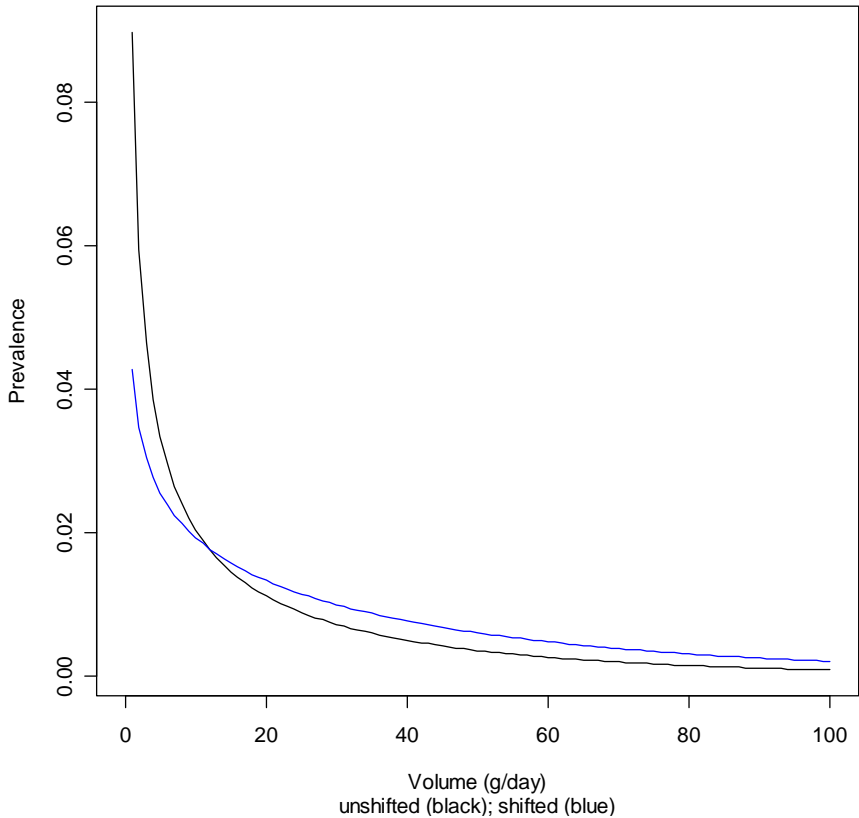

Supplement: MOESM4 [file 9572694]
